# Supplementary material for: Preclinical Evaluation of Vemurafenib as Therapy for BRAFV600E Mutated Sarcomas
Source: MDPI journal article supplement (doi:10.3390/ijms19040969), 2018-03-23
Supplement: s1 [file s1]

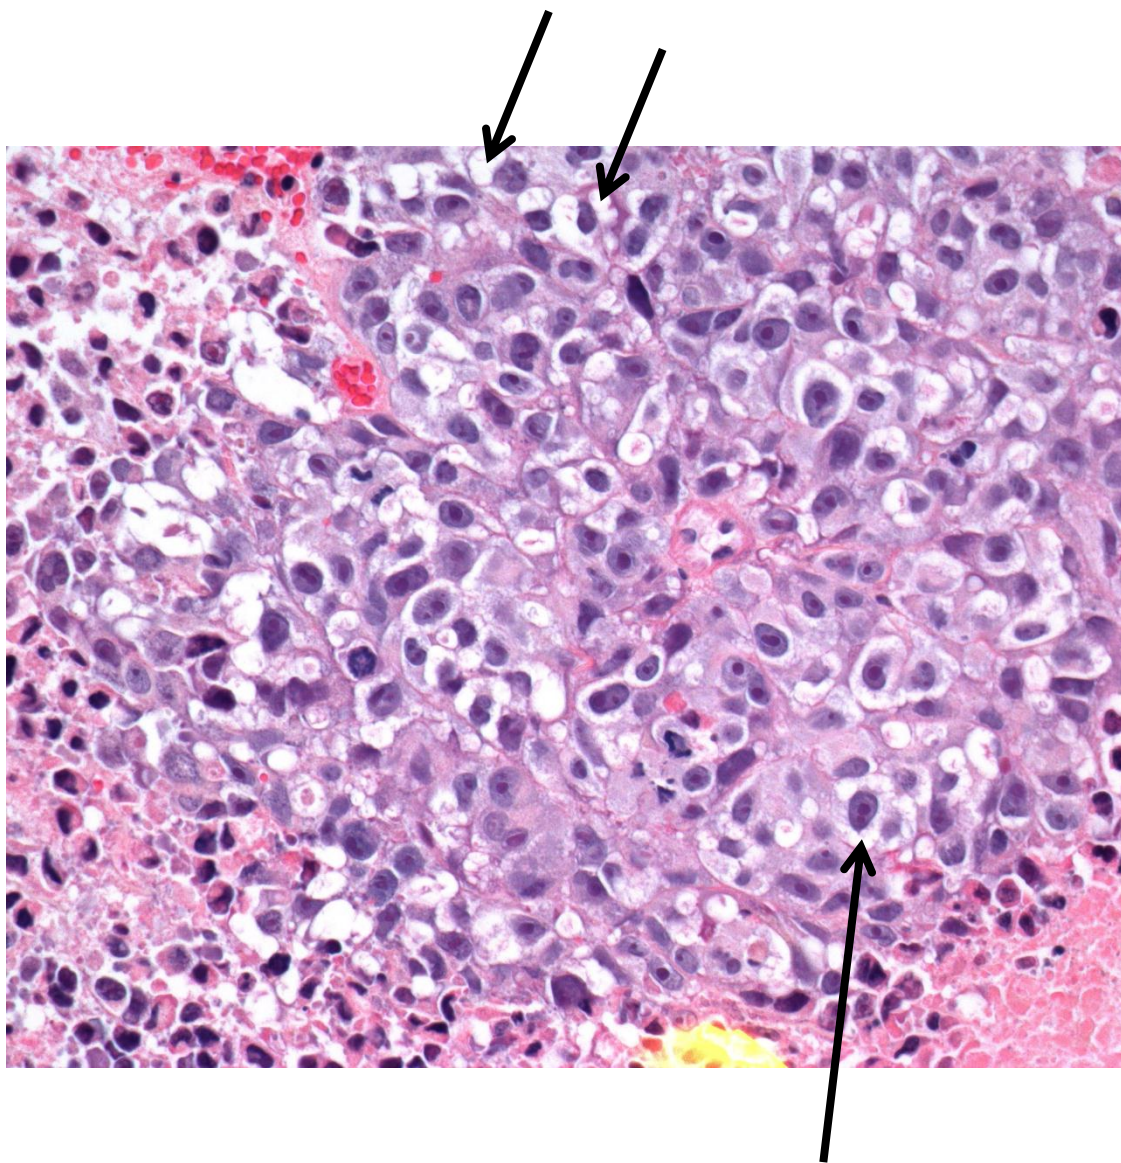

Supplementary Fig. S1: HE-stained section of SA-4 tumors grown in immunocompromised mice. Arrows indicate cells with lipid droplets
